# Supplementary material
Source: PubMed Central journal article supplement (PMC4618158)
Supplement: NIHMS719802-supplement-2.pdf [file NIHMS719802-supplement-2.pdf]

## **Supplemental materials and methods**

### **Sheep and mouse red blood cells conjugation**

Sheep blood was obtained from Colorado Serum Company (Denver, CO) and mouse and human blood were always harvested freshly from healthy donors. For conjugation of RBCs with PKH26 (Sigma), the procedure was conducted following the manual instruction with 20 $\mu$ M PKH26 per 500 $\mu$ l blood cells in 1ml conjugation buffer. For RBC-OVA conjugation, chicken ovalbumin (OVA) (Sigma-Aldrich, St. Louis, MO) was first cross-linked with hen egg lysozyme (HEL) (Sigma-Aldrich) using glutaraldehyde (Sigma-Aldrich) and HEL-OVA was then conjugated to RBCs with HEL as a linker protein (OVA protein conjugated poorly to RBCs as compared to HEL; Yi T and Cyster JG., unpublished observation). RBCs were washed with PBS three times, mixed with HEL-OVA (50  $\mu$ g/ml), crosslinked with EDCI (1-ethyl-3-(3-dimethylaminopropyl) carbodiimide, Sigma) for 30min, and washed three times to remove free protein. Conjugation efficiency was determined by anti-HEL (HyHEL9) FACS staining.

### **Flow Cytometry and antibody blockade**

Antibodies were biotin, FITC, PE, APC, PerCP-Cy5.5, PE-Cy7, APC-Cy7, pacific blue, and BV605 conjugated anti-CD4 (GK1.5 or RM4-5), CD8 (53-6.7), TCR $\beta$  (H57-597), TCRV $\alpha$ 2 (B20.1), CD80 (16-10A1), CD86 (GL-1), CCR7 (4B12), I-A<sup>b</sup> (KH74), DCIR2 (33D1), B220 (RA3-6B2), GL7 (GL-7), Fas (DX2), IgD (11-26c.2a), ICOS (15F9), PD-1 (29F.1A12), and CXCR5 (L138D7) (all purchased from Biolegend, eBioscience or BD Pharmingen). For intracellular signaling molecule staining, splenocytes were mashed through 70 $\mu$ m cell strainers and instantly fixed with 1.5% *paraformaldehyde* (PFA) in RPMI with 5% fetal bovine serum for 10min. After centrifugation (1600rpm for 5min), the

cell pellet was permeabilized with 1ml cold methanol, added slowly while vortexing. Cells then incubated in cold methanol at -20°C overnight. Cells then were washed twice with PBS with 2% FBS, blocked with goat serum and anti-CD16/32, and stained with anti-pErk (197G2), anti-pCreb (87G3), anti-pS6 (D68F8), anti-pP38 (D3F9) (all obtained from Cell signaling; Beverly, MA). Data were acquired on a BD LSR II and analysis was performed using FlowJo (Treestar). Anti-Sirpα (P84) antibody, which previously reported to block Sirpα and CD47 interaction (Oldenborg et al., 2000), was purchased from Biolegend (San Diego, CA), and control rat IgG (anti-KLH) was purchased from BioXcell. For antibody blockade, mice were intravenously injected with 200µg through the tail vein. For DC sorting in RNAseq analysis, Ebi2<sup>+/-</sup> mice were i.v. immunized with PBS or sheep red blood cells (1x10<sup>9</sup>). 1 hour after immunization, spleens were meshed into single cell suspension through a 100-µm cell strainer in PBS buffers containing 2% FCS and 2 mM EDTA. CD4 DCs were first pre-enriched with anti-CD11c microbeads and MACS manual cell separation columns (Miltenyi Biotec) and further sorted based on surface markers of CD11c<sup>+</sup>I-Ab<sup>+</sup>CD4<sup>+</sup>CD8<sup>-</sup>. Cells were sorted twice on a FACSAria III with a 100-µm nozzle to purities of over 99%. Equal number of DCs (5.0x10<sup>5</sup>) in SRBC or PBS immunized group was then snapped frozen immediately for RNA isolation.

### **Complement depletion**

Mice were intraperitoneally injected with 4 units/mouse Cobra Venom Factor (Quidel; San Diego, CA) every 12 hrs for 36 hrs. Pilot experiment shows that the effect lasted up to 72 hrs.

**Cell adoptive transfer and immunizations.** For RBC immunization, RBCs were washed three times with sterile PBS and injected through the tail vein. SRBCs ( $2 \times 10^8$ ), human RBCs from 100  $\mu$ l blood, or mouse RBCs from 30  $\mu$ l (or volumes indicated) of blood with or without prior PKH26 labeling were injected intravenously into recipient mice through the tail vein. To visualize cell proliferation,  $0.5-1 \times 10^6$  OT-I (CD45.1<sup>+</sup>CD45.2<sup>+</sup>) or OT-II (CD45.1<sup>+</sup>) splenocytes labeled with CellTrace™ violet cell proliferation kit (Molecular Probes, Invitrogen) were injected intravenously into WT C57BL/6 (CD45.2<sup>+</sup>) recipients; RBC-OVA conjugates or 33D1-OVA were intravenously injected 24hr after cell transfer. 33D1-OVA was produced by transfecting 293T cells with 33D1-OVA plasmid (kindly provided by Michel Nussenzweig, Rockefeller Univ., New York, NY) and purified through protein G affinity chromatography.

**Reference:**

Oldenborg, P.A., Zheleznyak, A., Fang, Y.F., Lagenaur, C.F., Gresham, H.D., and Lindberg, F.P. (2000). Role of CD47 as a marker of self on red blood cells. *Science* 288, 2051-2054.

## Supplementary Table and Figures

**Table S1. SRBCs upregulate splenic CD4<sup>+</sup> DC activation transcripts (refers to Figure 1).** RNA-seq analysis of CD4<sup>+</sup> DCs from mice with or without SRBC immunization. Top 100 most upregulated genes upon 1hr SRBC immunization are listed. Average of two replicated reads is shown.

**Figure S1. Activation of splenic CD4<sup>+</sup>Sirpα<sup>hi</sup> DCs by sheep and human RBCs (refers to Figure 1).** (A) Mice were i.v. immunized with PBS or sonicated SRBC and analyzed 3hr later by flow cytometry for CD86, MHCII, and CCR7 in gated CD4<sup>+</sup> DCs. (B) Mice were i.v. immunized with PBS or indicated volumes of human RBCs and analyzed as in A. One representative experiment from four different human donors is shown. (C) WT or CD169DTR mice were treated with DT at days -4 and -1, mice were i.v. immunized with PBS or SRBCs on day 0 and then analyzed as in A. (D) Confocal microscope image of spleen section from a mouse that had been i.v. immunized with PKH26 (red) labeled SRBCs 30min earlier, stained for DCIR2 (33D1, green) and IgD (blue). (E) *Fcer1g*<sup>-/-</sup> mice were immunized and analyzed as in A. (F) Sirpα expression in gated CD4<sup>+</sup> and CD8<sup>+</sup> DCs. CD4<sup>+</sup> DCs that were in vivo pre-blocked with unconjugated Sirpα antibody were used as negative controls (background is similar to isotype control, data not shown). (G) *Sirpa* transcript in FACS-sorted CD4<sup>+</sup> DCs, CD8<sup>+</sup> DCs, or T cells. *Hprt* was used as internal control for normalization (mean ±SE, n=3).

**Figure S2. Activation and capture of *Cd47*<sup>-/-</sup> RBCs by splenic CD4<sup>+</sup> DCs (refers to Figure 2).** (A) Mice were i.v. immunized with WT or titrated amounts of *Cd47*<sup>-/-</sup> RBCs and analyzed 3hr later by flow cytometry for CD86 and CCR7 in gated CD4<sup>+</sup> DCs. (B) Mice were i.v. immunized with WT or 30 μl *Cd47*<sup>-/-</sup> RBCs isolated using the indicated

method and analyzed 3hr later for CD86 and CCR7 in gated CD4<sup>+</sup> DCs. **(C)** Mice were i.v. immunized with purified white-blood cells or red-blood cells from 40ul of blood and analyzed 3hr later as in B. **(D)** Mice were i.v. immunized with PKH26-labeled WT or *Cd47*<sup>-/-</sup> and analyzed 3hr later by flow cytometry for PKH26 in gated CD4<sup>+</sup> or CD8<sup>+</sup> DCs.

**Figure S3. Activation of splenic CD4<sup>+</sup> DCs by Sirp $\alpha$  blockade and DC deficiency in *Cd47*<sup>-/-</sup> mice (refers to Figure 3).** **(A)** Mice were i.v. injected with anti-Sirp $\alpha$  or control rat IgG2a and analyzed 6hr later by flow cytometry for CD86, MHCII, and CCR7 in gated CD4<sup>+</sup> and CD8<sup>+</sup> DCs. Mean fluorescence intensity (MFI) of gated CD4<sup>+</sup> or CD8<sup>+</sup> DCs relative to that of rat IgG control treated mice (mean $\pm$ SE, n=3). **(B, C)** Flow cytometric analysis of splenocytes from WT or *Cd47*<sup>-/-</sup> mice. **B**, representative flow cytometric pattern; **C**, mean ( $\pm$ SE) of splenic total DC, CD4<sup>+</sup> DC, and CD8<sup>+</sup> DC number in WT and *Cd47*<sup>-/-</sup> mice (n=3).

**Figure S4. *Cd47*<sup>-/-</sup> RBCs, SRBCs and blockade of Sirp $\alpha$  augments CD4<sup>+</sup> T cells responses (refers to Figure 4).** **(A-C)** CD45.1<sup>+</sup> OTII splenocytes were labeled with cell trace violet and adoptively transferred to WT mice. One day later, mice were i.v. immunized with or without 33D1-OVA followed 30min later by 30  $\mu$ l of WT or *Cd47*<sup>-/-</sup> RBCs (A, B) or anti-Sirp $\alpha$  (C). 3 days after immunization, proliferation of OTII cells was visualized by violet tracer dye dilution. n=3 mice in each group. **(D)** CD45.1<sup>+</sup> OTII splenocytes were labeled with cell trace violet and adoptively transferred to WT mice and 1 day later, mice were immunized with WT or *Cd47*<sup>-/-</sup> RBC-OVA conjugate. 3 days post immunization, PD1 and CXCR5 on OTII cells was examined by flow cytometry. Numbers on gates indicate mean ( $\pm$ SE) frequencies for three mice. **(E)** CD45.1<sup>+</sup> OTII splenocytes were labeled with cell trace violet and adoptively transferred to WT or *Cd47*<sup>-/-</sup> mice and 1 day later mice were immunized with SRBC-OVA conjugate. 3 days post

immunization, PD1 and ICOS on OTII cells was examined by flow cytometry. Numbers on gates indicate mean ( $\pm$ SE) frequencies for three mice. **(F)** Flow cytometric analysis of Sirpa expression on CD4<sup>+</sup> or CD8<sup>+</sup> DCs from *Ebi2*<sup>+/-</sup> or *Ebi2*<sup>-/-</sup> mice.

**Figure S5. Intrinsic requirement of Src family kinases in *Cd47*<sup>-/-</sup> RBC-mediated DC activation (refers to Figure 5).** **(A)** *Fgr*<sup>-/-</sup>, *Lyn*<sup>-/-</sup>, and *Hck*<sup>-/-</sup> mice were i.v. immunized with WT or *Cd47*<sup>-/-</sup> RBCs and analyzed 3hr later by flow cytometry for CD86, MHCII, and CCR7 in gated CD4<sup>+</sup> DCs. **(B)** WT or *Hck*<sup>-/-</sup>*Fgr*<sup>-/-</sup>*Lyn*<sup>-/-</sup> mice were i.v. immunized with LPS and analyzed 3hr later as in A. **(C)** Flow cytometric analysis of splenic DCs from WT or *Hck*<sup>-/-</sup>*Fgr*<sup>-/-</sup>*Lyn*<sup>-/-</sup> mice. **(D)** Summary of WT:*Hck*<sup>-/-</sup>*Fgr*<sup>-/-</sup>*Lyn*<sup>-/-</sup> (HFL) mixed BM chimera data of the type shown in Figure 5D. Mean fluorescence intensity (MFI) of gated CD4<sup>+</sup> DCs is shown (mean $\pm$ SE, n=4 mice). **(E)** Wild-type CD45.1<sup>+</sup> mice were reconstituted with mixed BM cells (1:1 ratio) from Zbtb46DTR mice (CD45.1<sup>+</sup>CD45.2<sup>+</sup>) and CD45.2<sup>+</sup> *Hck*<sup>-/-</sup>*Fgr*<sup>-/-</sup>*Lyn*<sup>-/-</sup> or WT mice. Chimeras were DT treated at days -4 and -1, immunized with PKH26-labeled WT or *Cd47*<sup>-/-</sup> RBCs on day 0 and analyzed 3 hr later by flow cytometry for PKH26, CD86, and CCR7 in gated CD4 DCs (n=3 mice). **(F)** Wild-type CD45.1<sup>+</sup> mice were reconstituted with fetal liver from *Syk*<sup>-/-</sup> mice. Chimeras were immunized with WT or *Cd47*<sup>-/-</sup> RBCs, or SRBCs and analyzed 3hr later as in A.

**Figure S6. Integrin  $\beta$  2 contributes to *Cd47*<sup>-/-</sup> RBC-mediated splenic CD4 DC activation (refers to Figure 6).** **(A, B)** Mice reconstituted with mixed BM cells (1:1 ratio) from Zbtb46DTR and *Itgb2*<sup>-/-</sup> or WT mice were DT treated at days -6 and -3, immunized with PKH26-labeled WT or *Cd47*<sup>-/-</sup> RBCs on day 0 and analyzed 3 hr or 6 hr later (n=3 mice). **A**, Representative FACS analysis of PKH26, CD86, and CCR7 in gated CD4 DCs. **B**, Immunohistochemical staining of DCIR2 (33D1, brown) and IgD

(blue) on spleen sections taken at 6 hr. Black arrows highlight DCs in MZ bridging channels. **(C)** Wild-type CD45.1<sup>+</sup> mice were reconstituted with *CD11c<sup>cre/+</sup> Lrp1<sup>Flox/Flox</sup>* (DC-*Lrp1<sup>-/-</sup>*) or control BM. Chimeras were immunized with 30µl WT or PKH26 labeled *Cd47<sup>-/-</sup>* RBCs, and analyzed 3hr later as in A. **(D)** OTII T cell response in mice reconstituted with *Itgb2<sup>+/+</sup>* and *Itgb2<sup>-/-</sup>* BM cells. GFP<sup>+</sup> OTII CD4<sup>+</sup> T cells were labeled with cell trace violet, adoptively transferred to the chimera mice and 1 day later mice were immunized with WT or *Cd47<sup>-/-</sup>* RBC-OVA conjugates. Frequency of OTII cells and violet tracer dilution were examined by flow cytometry. Numbers on gates indicate mean ( $\pm$ SE) frequencies for 3 mice. \*\*  $p < 0.01$ , unpaired student t test.

**Movie S1. Uptake of PKH26<sup>+</sup> RBCs by splenic DCs at the MZ bridging channel (refers to Figure 2).** Two photon microscopy of a vibratome sectioned spleen from a CD11c-yfp mouse that was i.v. immunized with PKH26-labeled *Cd47<sup>-/-</sup>* RBCs 20min earlier. YFP (green) and PKH26 (red). The image dimensions are 218, 215, 21 µm (x, y, z).

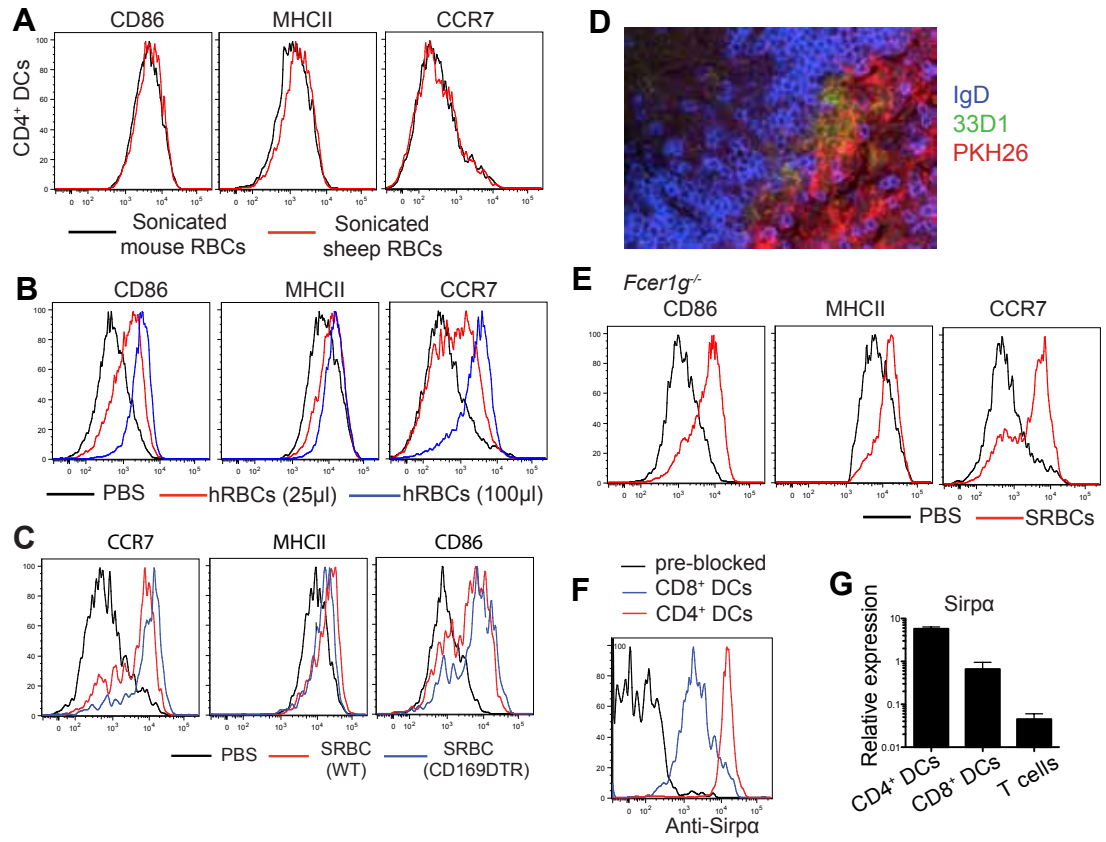

Figure S1



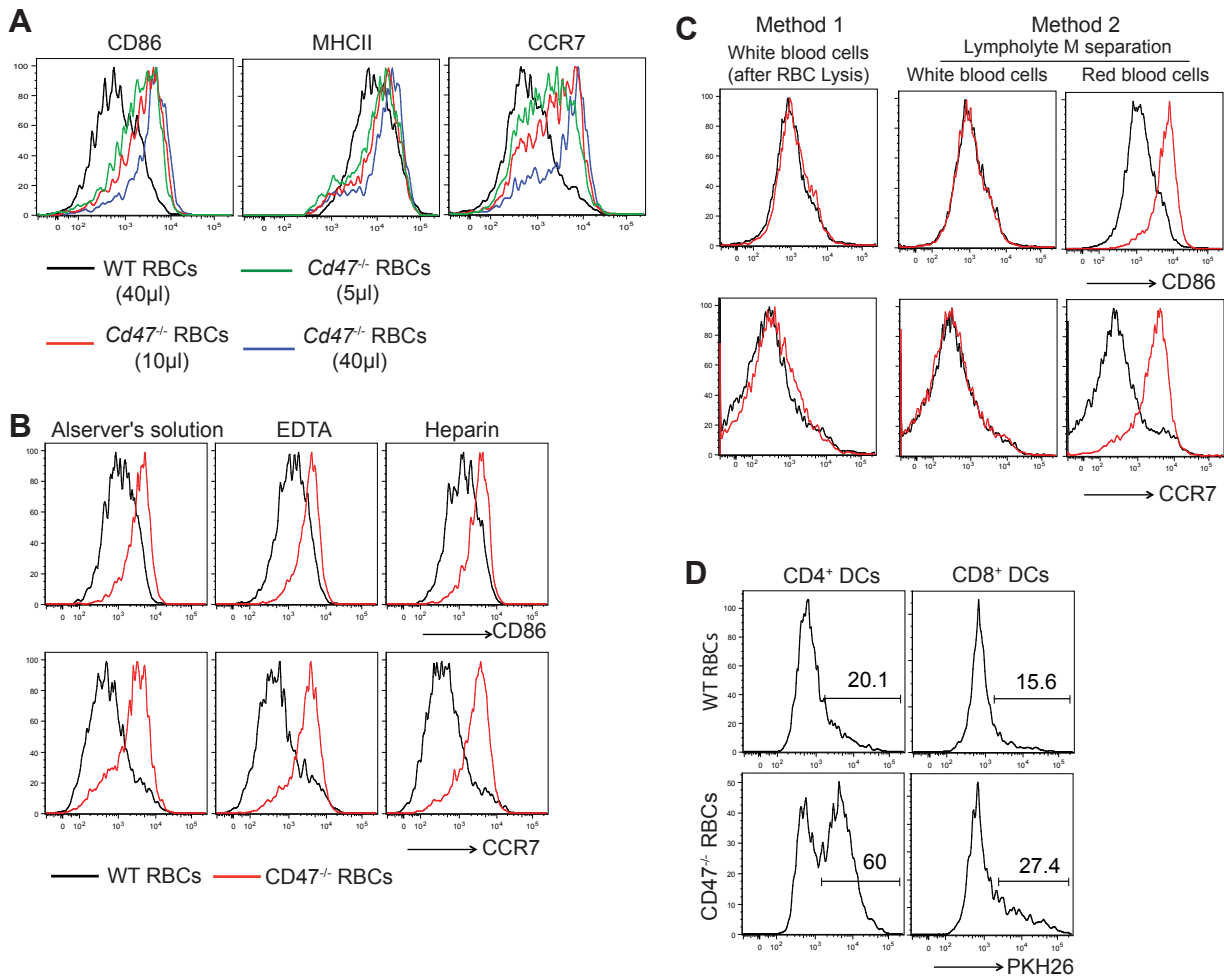

Figure S2

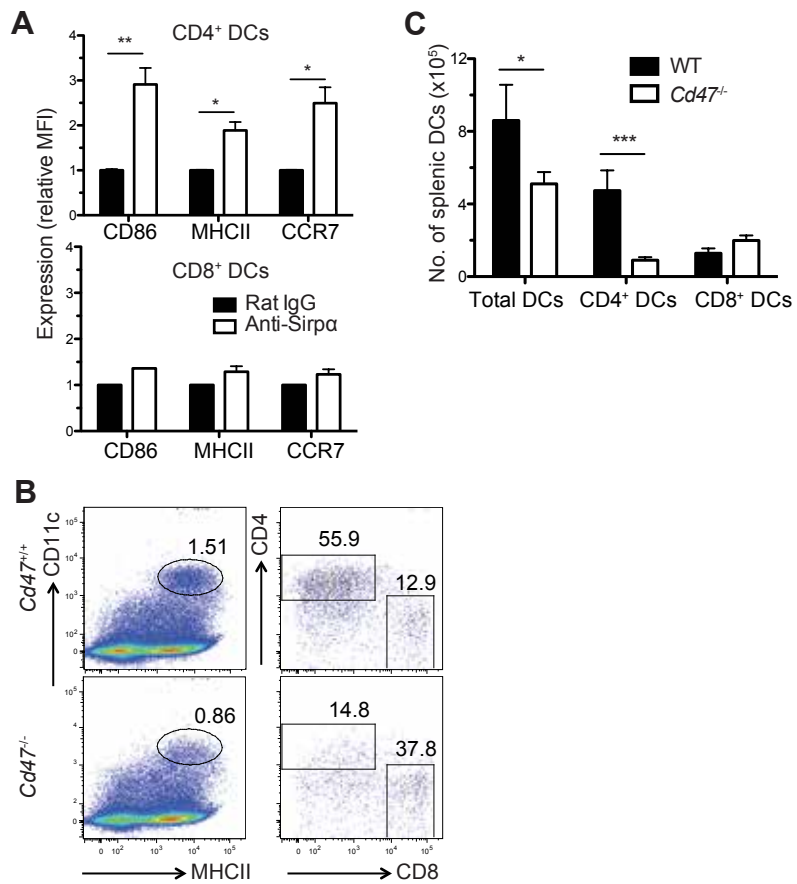

Figure S3

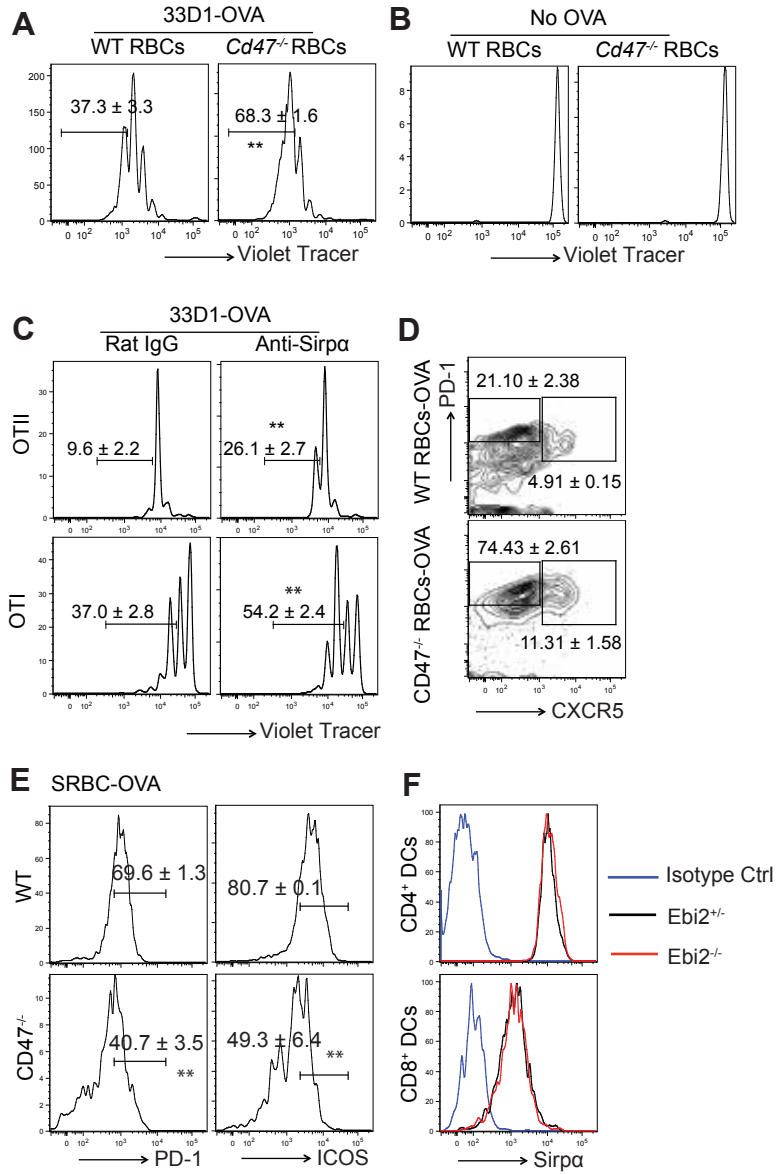

Figure S4

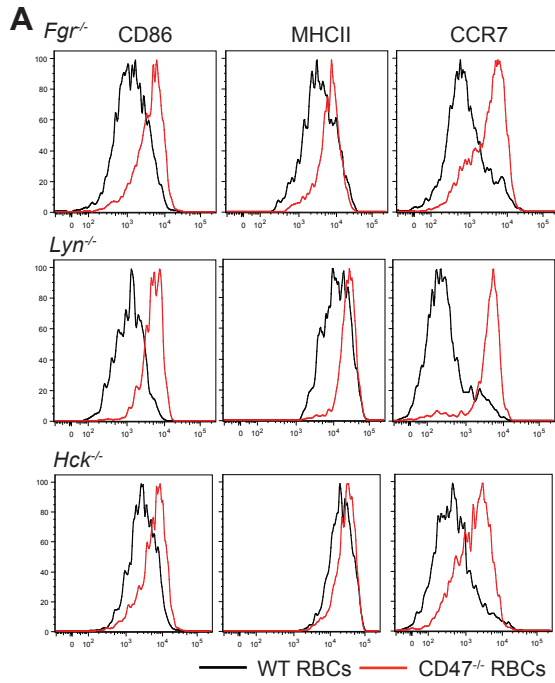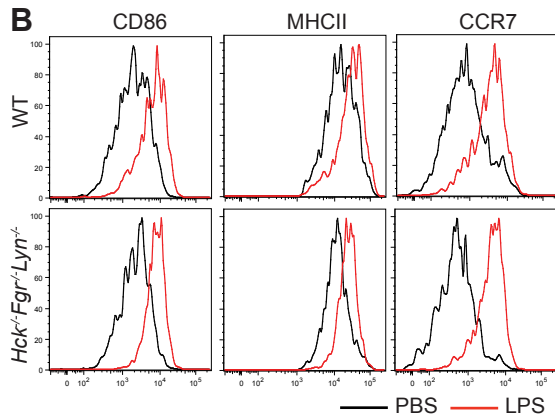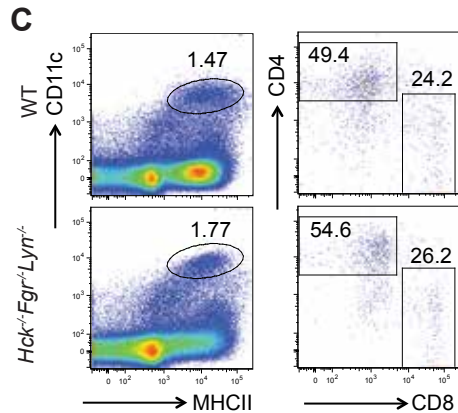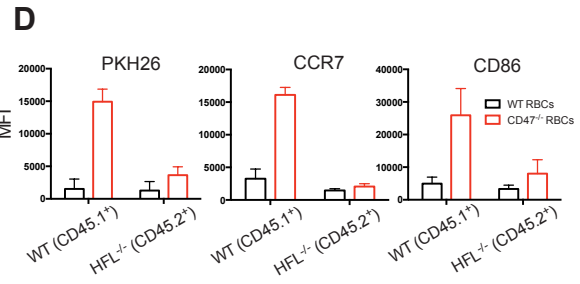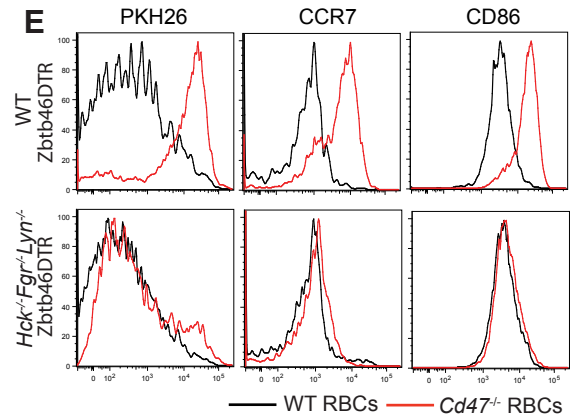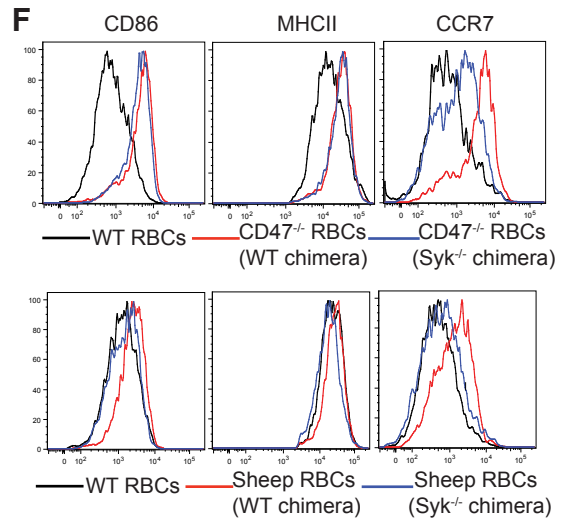

Figure S5

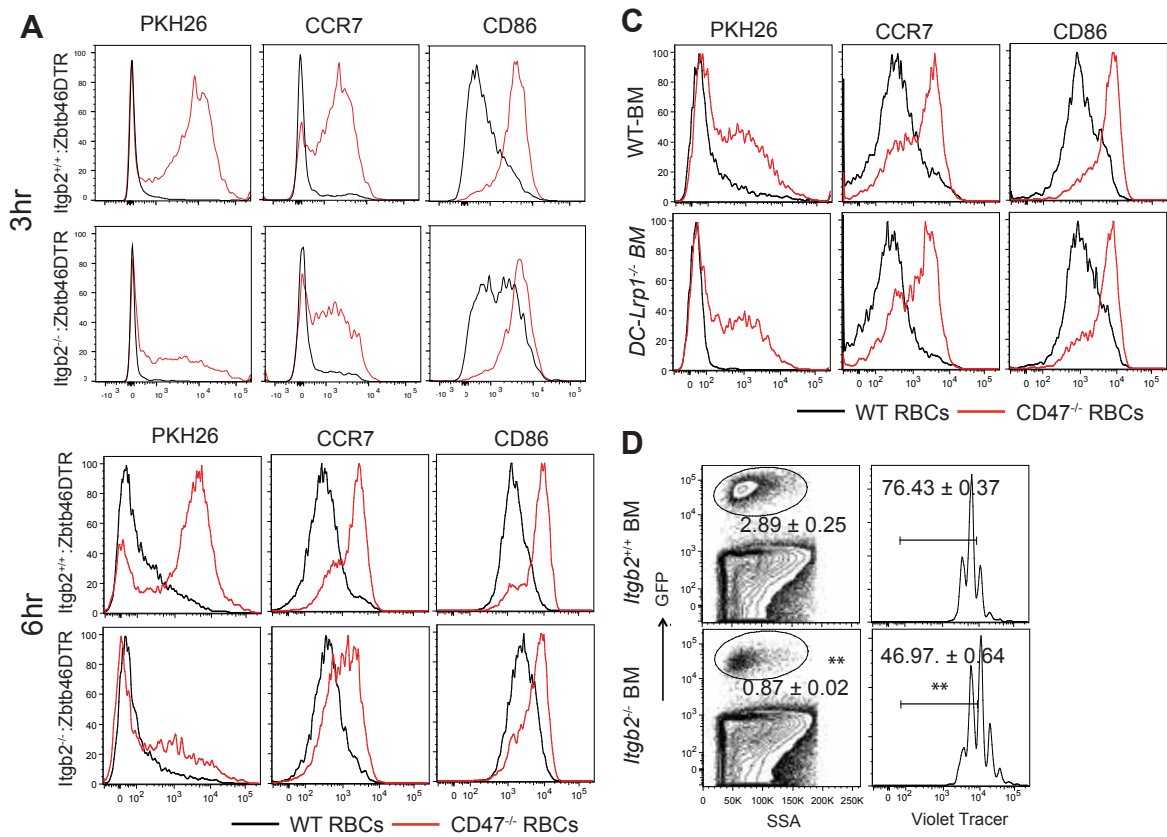

IgD 33D1

Figure S6
